# Supplementary material for: Flexible translucent chitosan–glycerin/QD nanocomposite glue for anti-counterfeiting films with strong adhesion and stability
Source: Royal Society of Chemistry journal article supplement (doi:10.1039/d0ra02718a), 2020-01-01
Supplement: d0ra02718a1.pdf [file d0ra02718a1.pdf]

## Supporting Information

### Flexible translucent Chitosan-Glycerin/QDs Nanocomposites Glue for Anti-Counterfeiting Films with Strong Adhesion and Stability

Yanyan Chen,\* Qi Hu, Qiang Wang, Minghui Yu, Xiaoyu Gong, Shenjie Li\*, Jin Xiao, Yingjie Guo,  
Guangyu Chen, Xinyu, Lai

*School of Chemistry and Chemical Engineering, HeFei University of Technology,  
Hefei, AnHui, 230009, People's Republic of China*

\* Corresponding author. Tel: +86-563-3831302;

Email: [yanyanchen@hfut.edu.cn](mailto:yanyanchen@hfut.edu.cn); [shenjieli@hfut.edu.cn](mailto:shenjieli@hfut.edu.cn)

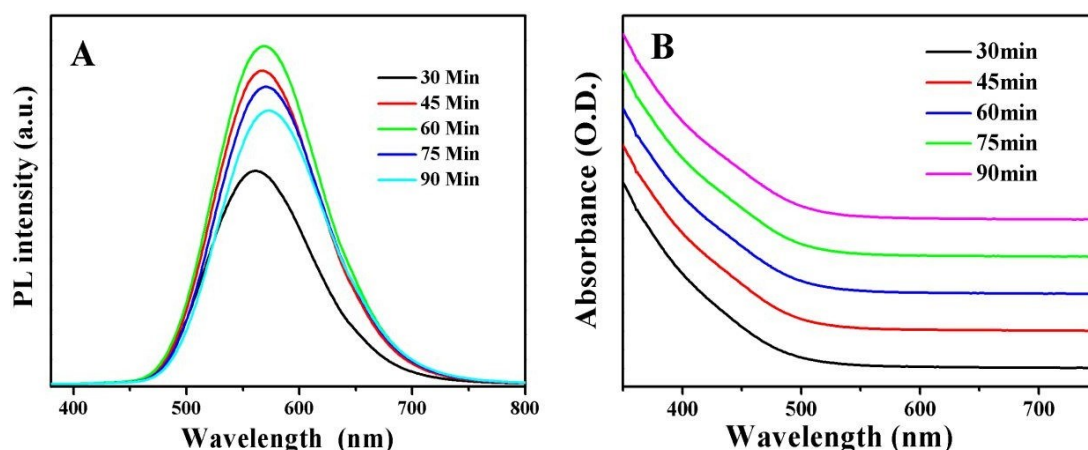

**Figure S1** The fluorescence emission spectra (A) and UV-vis absorption spectra (B) of AIZS core QDs obtained under different reaction time (the start ratios of Ag:In:Zn=1:4:1)

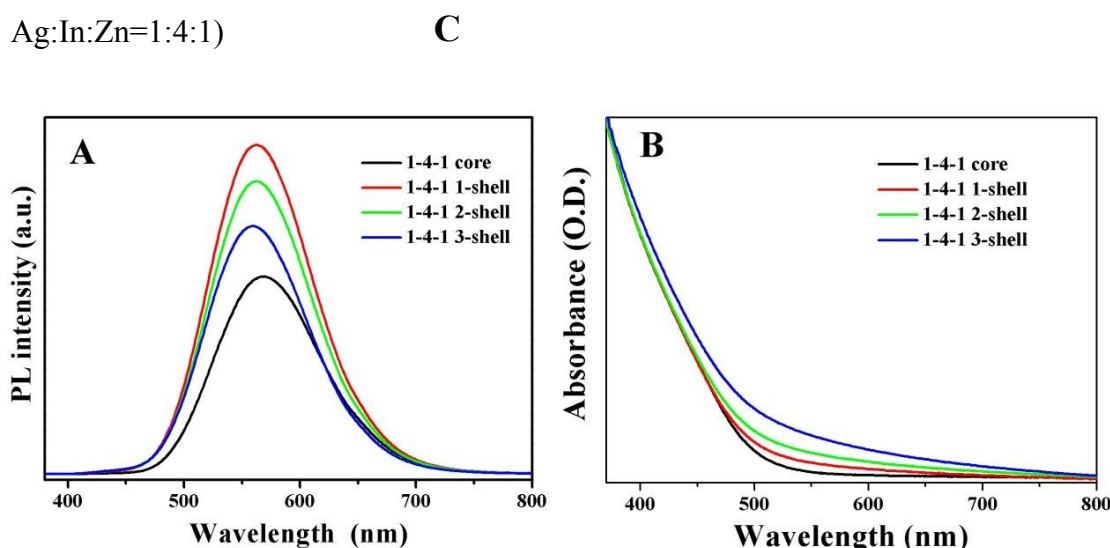

**Figure S2** The fluorescence emission spectra (A) and UV-vis absorption spectra (B) of AIZS/ZnS core/shell QDs obtained under different shells. (the start ratios of Ag:In:Zn=1:4:1)

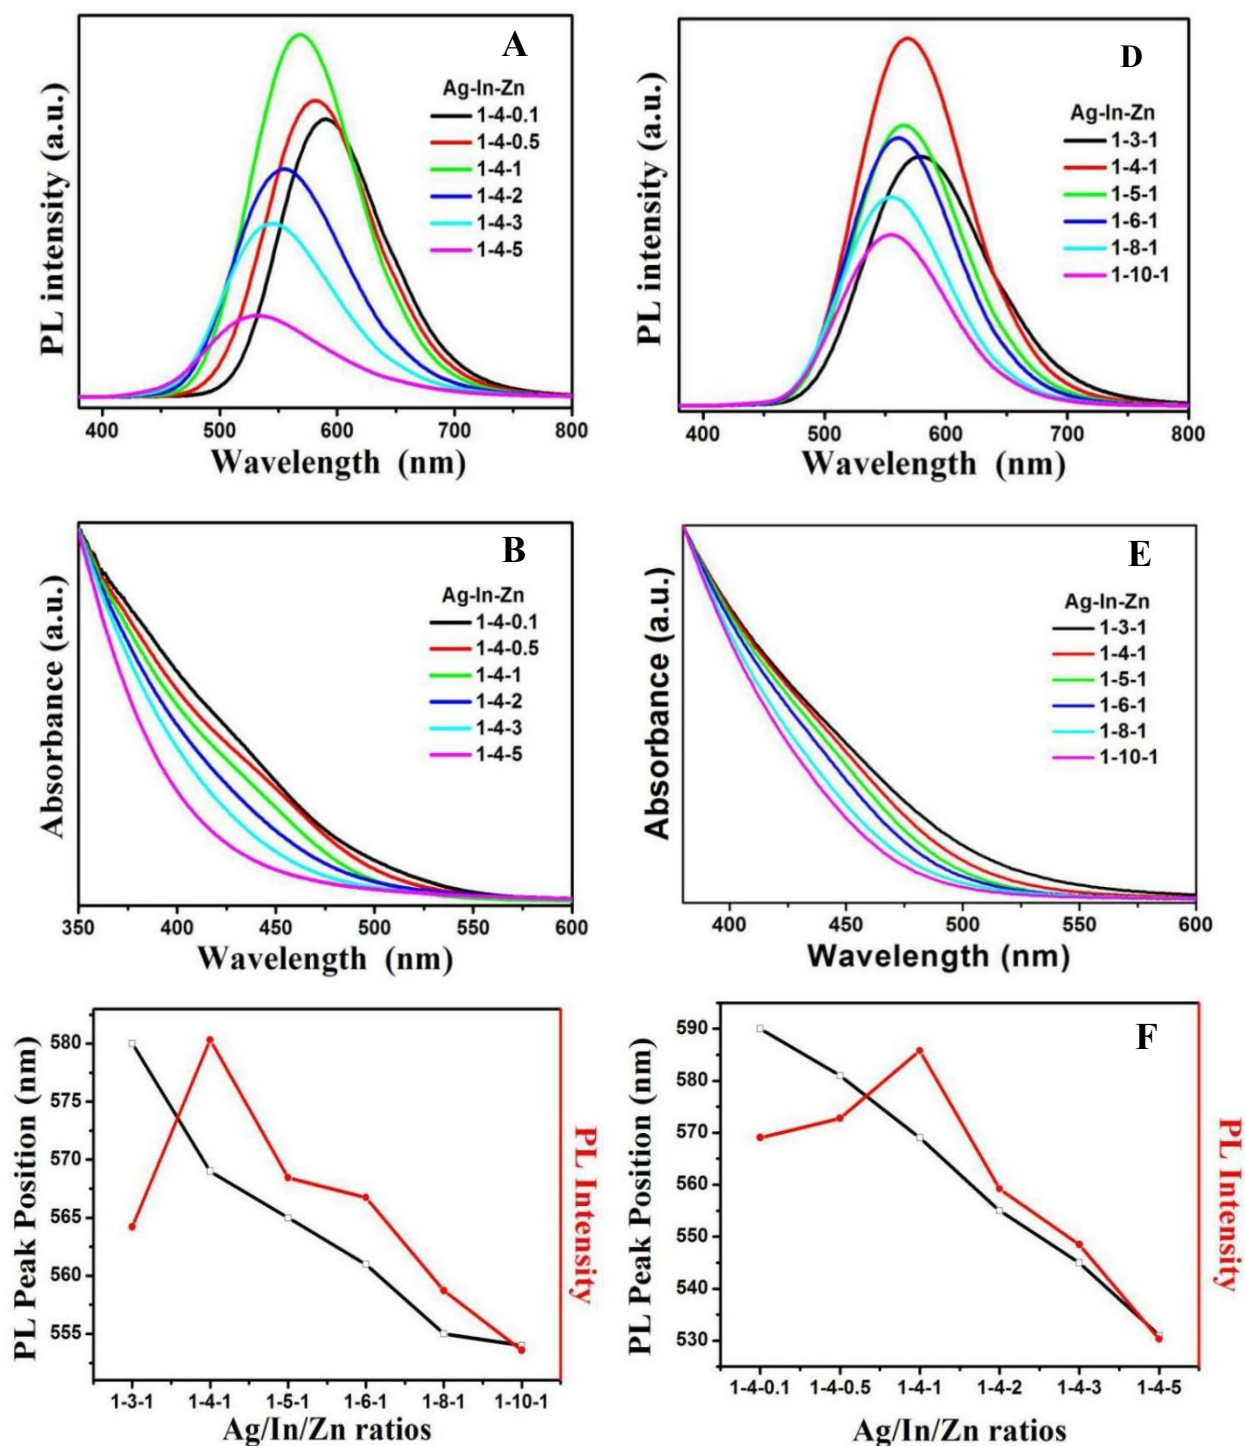

**Figure S3** The PL spectra, UV-vis absorption and corresponding line chart of PL peak position and the PL intensity of AIZS core QDs prepared with the start ratios of Ag:In:Zn=1:4:x (x=0.1, 0.5, 1, 2, 3, 5) (A, B,C) and Ag:In:Zn=1:4:x (x=0.1, 0.5, 1, 2, 3, 5) (D, E, F).

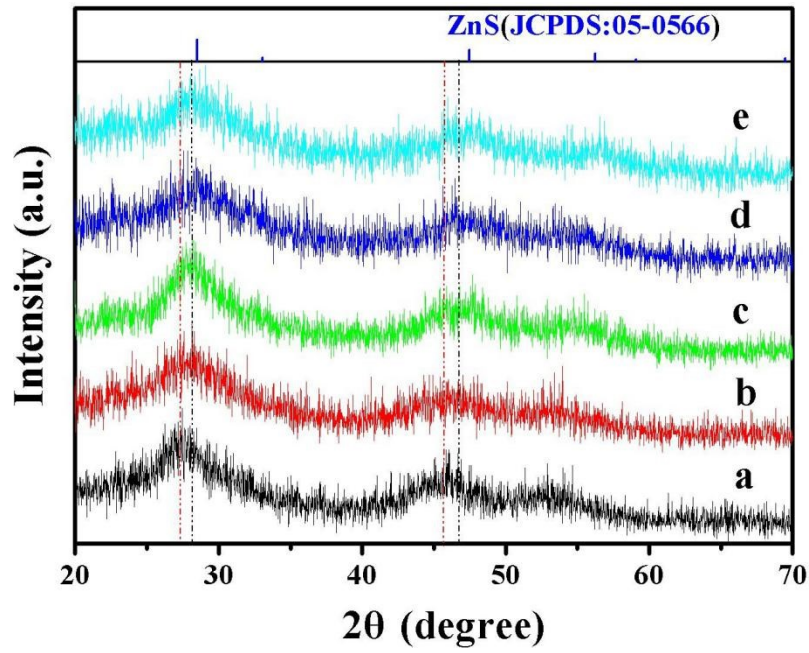

**Figure S4** XRD patterns of different AIZS core NCs: the ratios of Ag-In-Zn in pattern a to e is 1:4:0.1, 1:4:0.5, 1:4:1, 1:4:2, 1:4:4, respectively.

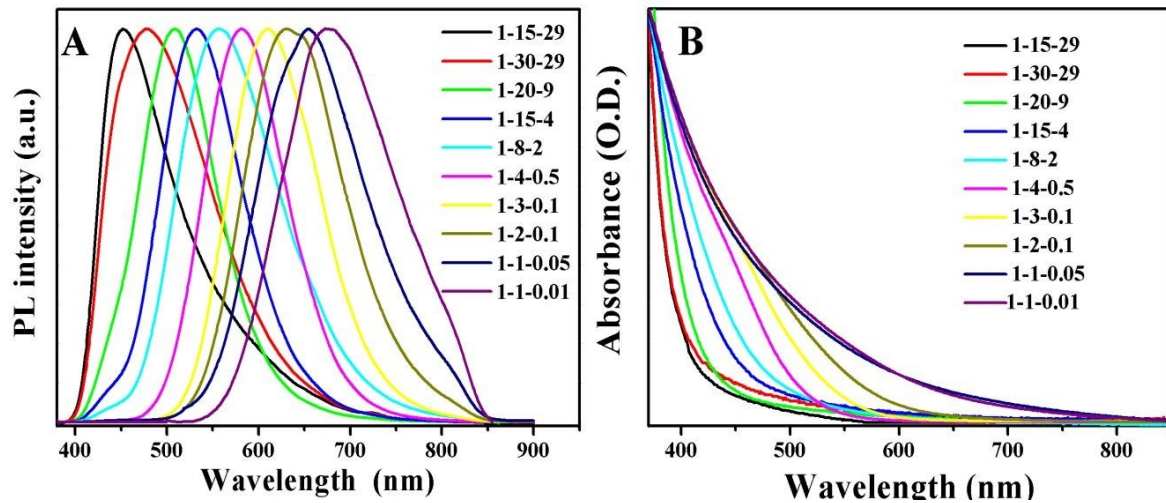

**Figure S5** The fluorescence emission spectra (A) and UV-vis absorption spectra (B) of AIZS core QDs obtained under different start ratios.

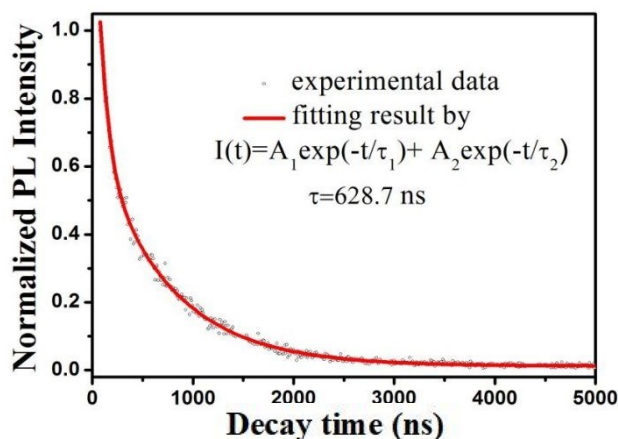

**Figure S6** Fluorescence decay curves of AIZS/ZnS core/shell QDs. (Ag/In/Zn=1/4/1)

**Table S1** Effect of gelatin content on transmittance of composite film. (*G* refers to Gelatin and *Ch* refers to Chitosan)

| Samples  | Light transmission at different wavelengths (%) |      |      |      |      |      |      |      | Thickness (mm) | Transparency value |
|----------|-------------------------------------------------|------|------|------|------|------|------|------|----------------|--------------------|
|          | 200                                             | 280  | 350  | 400  | 500  | 600  | 700  | 800  |                |                    |
| 90G:10Ch | 32.0                                            | 27.7 | 36.2 | 63.2 | 86.3 | 87.6 | 88.6 | 88.9 | 0.118          | 0.4872             |
| 80G:20Ch | 35.8                                            | 31.1 | 42.2 | 66.8 | 88.1 | 89.3 | 90.2 | 90.9 | 0.100          | 0.4915             |
| 70G:30Ch | 31.9                                            | 27.6 | 42.5 | 68.6 | 88.6 | 89.7 | 90.9 | 91.9 | 0.095          | 0.4969             |
| 60G:40Ch | 29.9                                            | 25.8 | 38.9 | 66.2 | 88.2 | 89.7 | 91.1 | 91.8 | 0.094          | 0.5022             |
| 50G:50Ch | 38.8                                            | 33.8 | 48.3 | 69.9 | 88.9 | 90.2 | 91.0 | 91.8 | 0.088          | 0.5090             |
| 40G:60Ch | 62.5                                            | 55.6 | 66.4 | 70.2 | 87.4 | 88.9 | 89.8 | 90.2 | 0.075          | 0.6813             |
| 30G:70Ch | 32.7                                            | 29.9 | 51.4 | 68.0 | 83.7 | 85.9 | 87.9 | 89.5 | 0.051          | 1.0202             |
| 20G:80Ch | 31.5                                            | 30.1 | 52.9 | 67.6 | 83.9 | 86.5 | 88.4 | 89.8 | 0.057          | 1.105              |
| 10G:90Ch | 42.4                                            | 43.3 | 59.7 | 66.2 | 83.3 | 85.9 | 88.0 | 89.7 | 0.055          | 1.2001             |

**Table S2** Effect of glycerine content on the transmittance of composite films. (Note: glycerine content=glycerine/(chitosan+gelatin); Chitosan/gelatin=1/1.)

| glycerine content | Light transmission at different wavelengths (%) |      |      |      |      |      | Thickness (mm) | Transparency value |
|-------------------|-------------------------------------------------|------|------|------|------|------|----------------|--------------------|
|                   | 350                                             | 400  | 500  | 600  | 700  | 800  |                |                    |
| 5%                | 46.3                                            | 72.0 | 88.7 | 89.9 | 90.9 | 91.5 | 0.0897         | 0.5155             |
| 10%               | 43.4                                            | 71.5 | 88.1 | 89.0 | 89.3 | 89.6 | 0.0893         | 0.5667             |
| 15%               | 45.0                                            | 72.1 | 89.2 | 90.3 | 90.9 | 91.1 | 0.0943         | 0.4699             |
| 20%               | 47.8                                            | 73.8 | 89.5 | 90.6 | 91.1 | 91.1 | 0.0710         | 0.6038             |
| 25%               | 45.1                                            | 71.6 | 88.9 | 90.2 | 90.7 | 91.1 | 0.0947         | 0.4730             |
| 30%               | 47.9                                            | 73.4 | 89.3 | 90.2 | 90.6 | 90.7 | 0.0850         | 0.5270             |

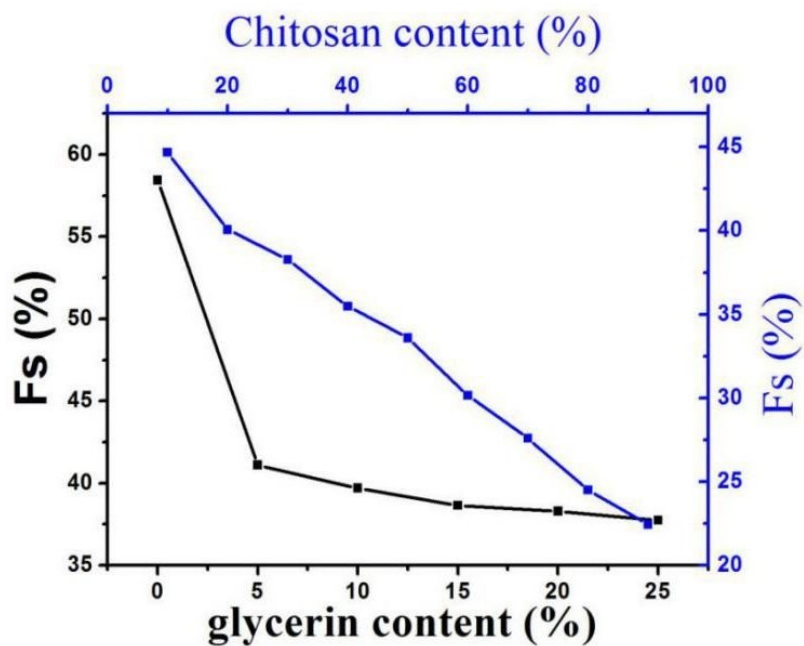

**Figure S7** The solubility of films obtained with different chitosan and glycerin content.

**Table S3** The specific composition of the composite films used in Figure S8, S9 and S10.

| <b>Film Code</b> | <b>NCs</b>                    | <b>Ratios of Ag-In-Zn</b> | <b>Gelatin</b> | <b>Chitosan</b> | <b>Glycerin</b> |
|------------------|-------------------------------|---------------------------|----------------|-----------------|-----------------|
| <b>a</b>         | Ag-In-Zn-S core NCs           | 1/8/1                     | √              | ×               | ×               |
| <b>b</b>         | Ag-In-Zn-S/ZnS core/shell NCs | 1/8/1                     | √              | ×               | ×               |
| <b>c</b>         | Ag-In-Zn-S core NCs           | 1/20/4                    | √              | ×               | ×               |
| <b>d</b>         | Ag-In-Zn-S/ZnS core/shell NCs | 1/20/4                    | √              | ×               | ×               |
| <b>e</b>         | Ag-In-Zn-S core NCs           | 1/8/1                     | √              | √               | √               |
| <b>f</b>         | Ag-In-Zn-S/ZnS core/shell NCs | 1/8/1                     | √              | √               | √               |
| <b>g</b>         | Ag-In-Zn-S core NCs           | 1/20/4                    | √              | √               | √               |
| <b>h</b>         | Ag-In-Zn-S/ZnS core/shell NCs | 1/20/4                    | √              | √               | √               |

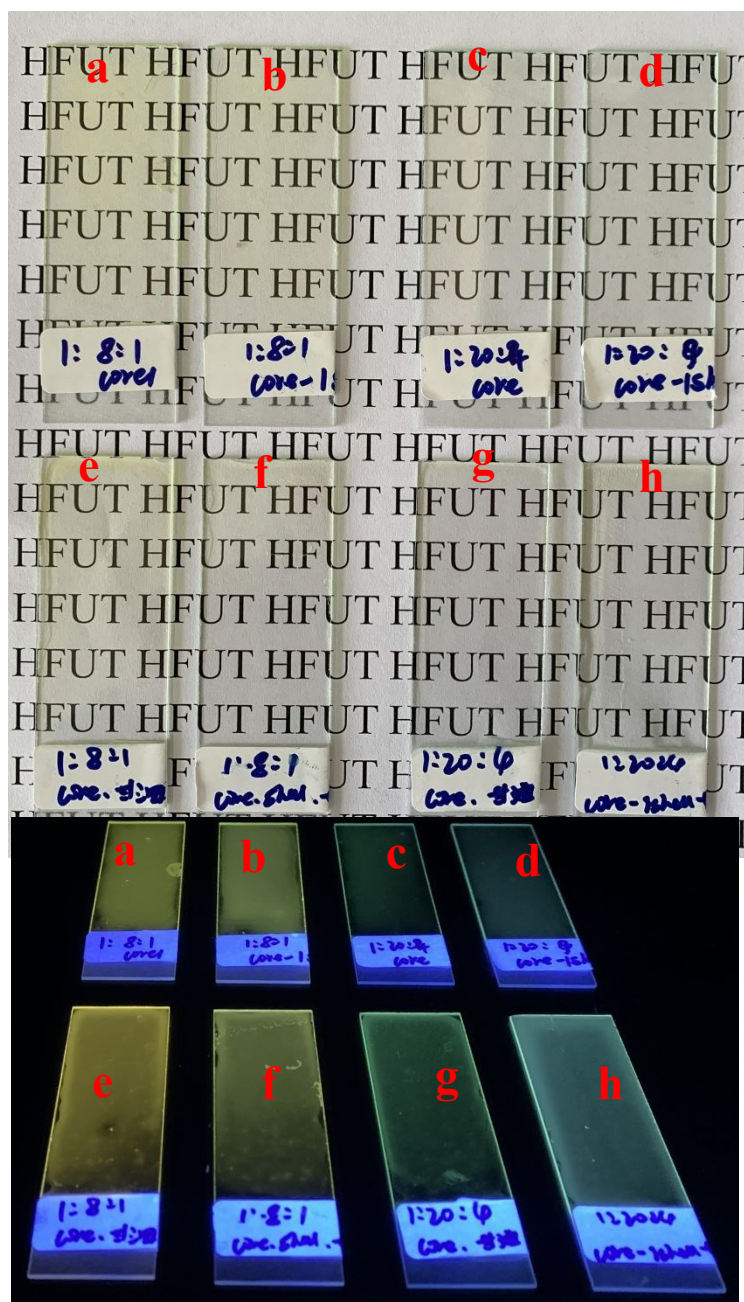

**Figure S8** Digital photographs of G-QDs TFs (a, b, c and d) and GCG-QDs TFs (e, f, g and h) on glass slides after drying in air taken under daylight (up) and UV-light (down). The specific composition of the composite membrane is shown in **Table S3**.

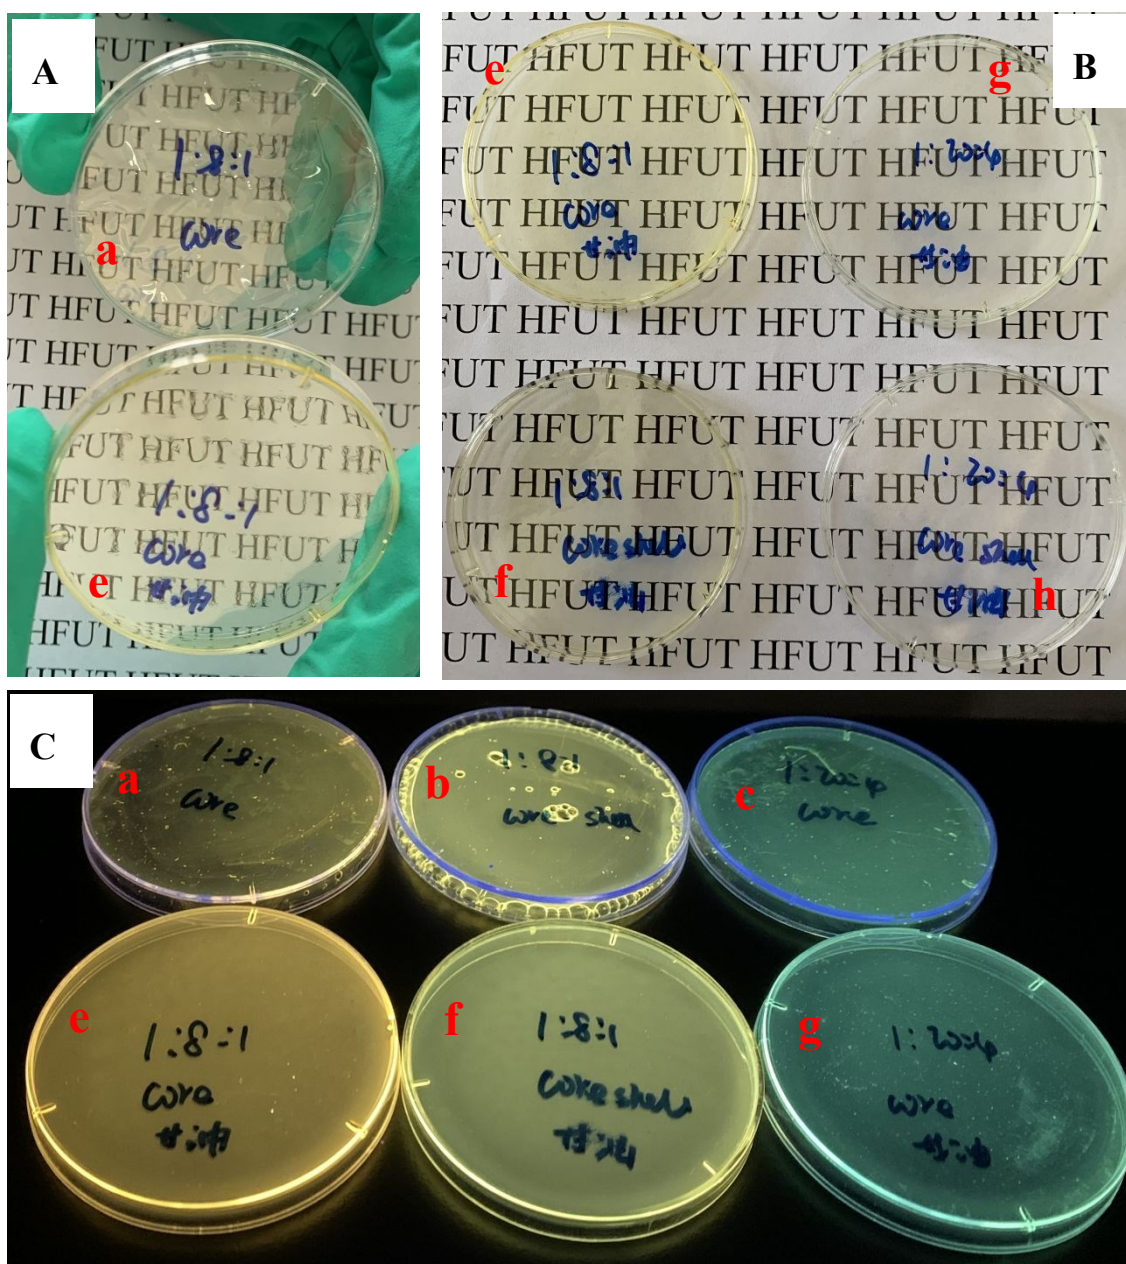

**Figure S9** Digital photographs of G-QDs TFs and GCG-QDs TFs on plastic water dishes after drying in air taken under daylight (A, B) and UV-light (C). The specific composition of the composite membrane is shown in the following **Table S3**.

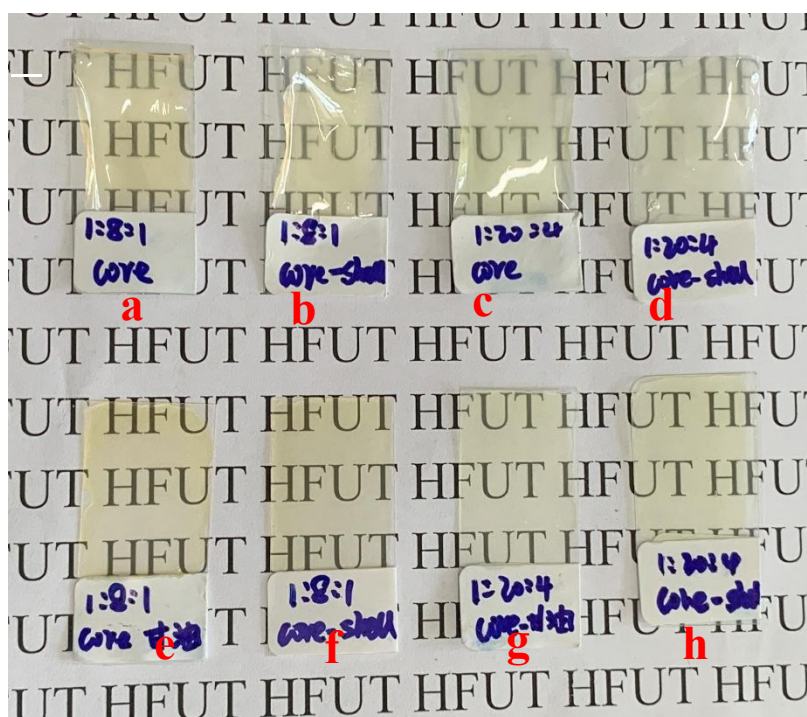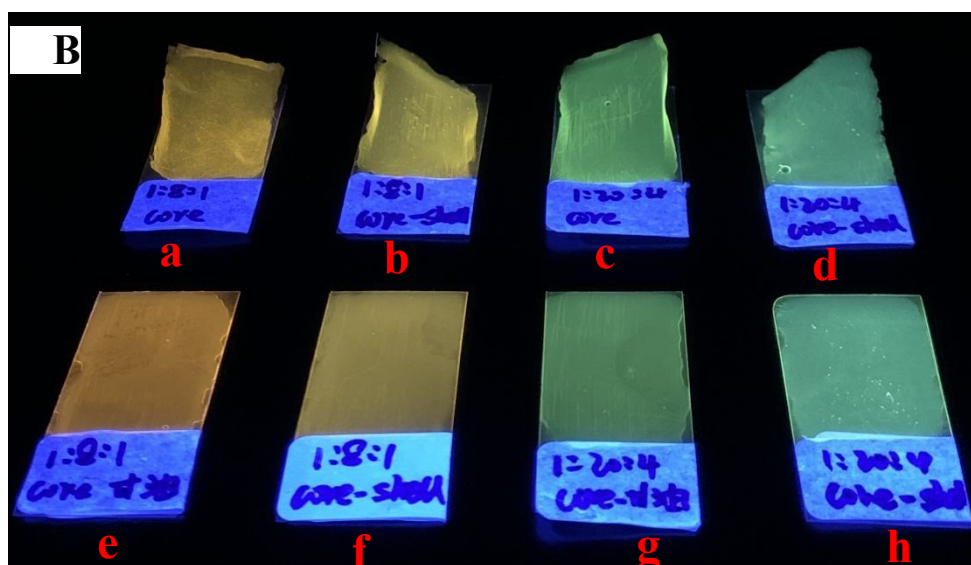

**Figure S10** Digital photographs of G-QDs TFs and GCG-QDs TFs on PVC sheets after drying in air taken under daylight (A) and UV-light (B). The specific composition of the composite membrane is shown in **Table S3**.



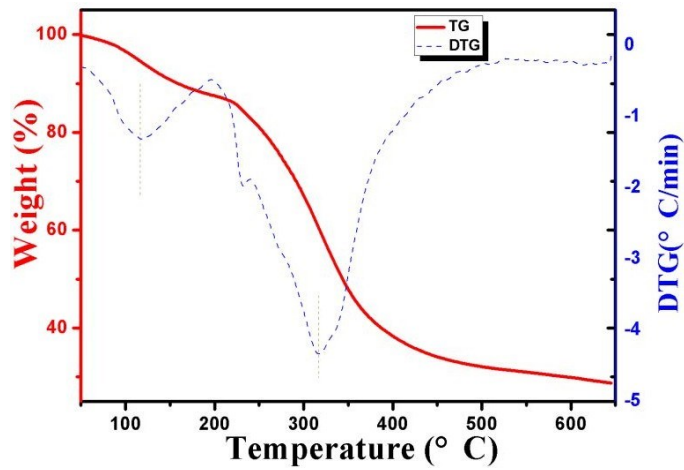

**Figure S11** TG and DTG curves for gelatin-chitosan-glycerin/QDs composite films.

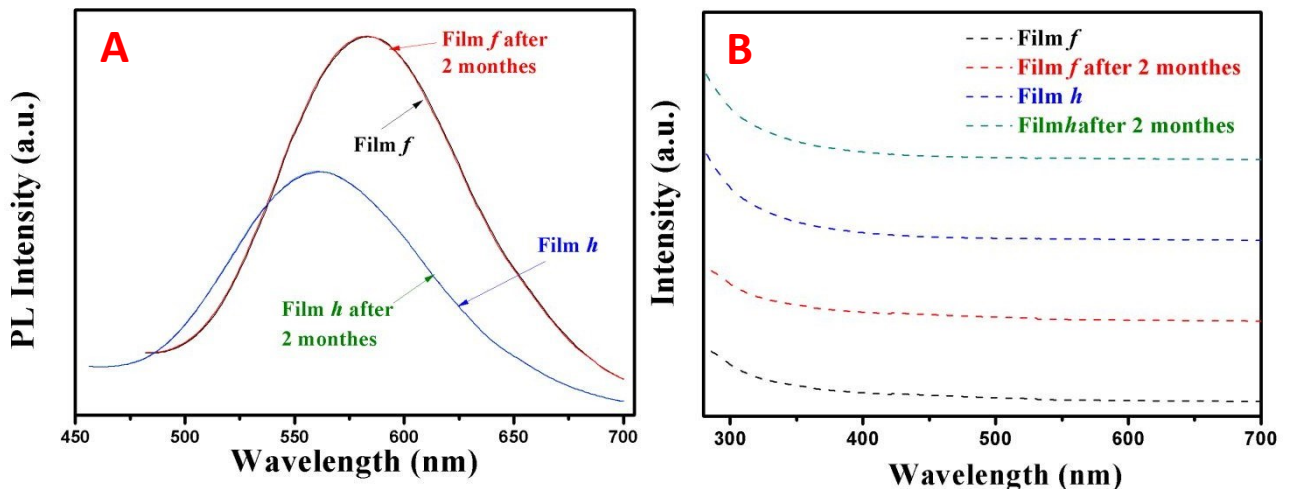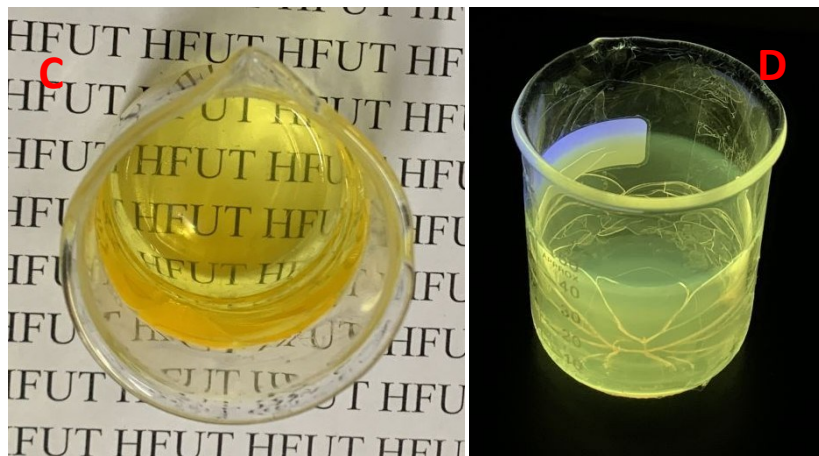

**Figure S12** The fluorescence emission spectra (A) and UV-vis absorption spectra (B) of GCG-QDTFs marked as *f* and *h* in Fig. S10 after two months of storage. Digital images of GCG-QD TFs on glass beaker under sunlight (C) and UV-light (D) after two months storage.
